# Supplementary material
Source: publisher site journal article supplement (https://www.dovepress.com/article/480207)
Supplement: Supplementary file 1 [file get_supplementary_file.php]

**Supplementary Table 1** Sex and age matched subanalysis of choroidal parameters. Clinical Characteristics.

| **Parameter** | **DM** | **SD** | **Control** | **SD** | **p** | **Total** | **SD** |
| --- | --- | --- | --- | --- | --- | --- | --- |
| **Age (years)** | 56.31 | 11.31 | 58.68 | 11.26 | 0.65 | 57.23 | 11.25 |
| **Female sex (%)** | 18 (50%) | - | 11 (50%) | - | 1.00 | 29 (50%) | - |
| **Scan quality** | 8.17 | 1.16 | 8.05 | 0.79 | 0.37 | 8.12 | 1.03 |
| **BCVA** | 0.95 | 0.10 | 0.95 | 0.11 | 0.92 | 0.95 | 0.10 |
| **Intraocular pressure (mmHg)** | 16.56 | 2.72 | 16.59 | 2.97 | 0.84 | 16.57 | 2.79 |
| **Spherical equivalent (D)** | 0.65 | 1.66 | 1.14 | 2.02 | 0.47 | 0.82 | 1.80 |
| **Axial length (mm)** | 23.41 | 0.92 | 23.17 | 1.08 | 0.39 | 23.33 | 0.98 |
| **Systolic BP (mmHg)** | 133.68 | 21.82 | 137.50 | 21.24 | 0.39 | 135.18 | 21.48 |
| **Diastolic BP (mmHg)** | 82.41 | 10.81 | 87.27 | 10.47 | 0.10 | 84.32 | 10.85 |
| **Hypertension (%)** | 21(58.33%) | - | 12(54.54%) | - | 0.78 | - | - |
| **Diabetes duration (years)** | 6.18 | 5.61 | - | - | - | - | - |
| **HbA1C (%)** | 7.23 | 1.55 | - | - | - | - | - |

**Abbreviations:** DM, diabetes mellitus type 2; SD, standard deviation; BCVA, best corrected visual acuity; D, dioptre; BP, blood pressure.

**Supplementary Table 2** Sex and age matched subanalysis of choroidal parameters. Comparison of vascularization parameters.

| **Parameter** | **DM** | **SD** | **Control** | **SD** | **p** | **Total** | **SD** |
| --- | --- | --- | --- | --- | --- | --- | --- |
| **CT superior** | 307.08 | 13.45 | 306.34 | 13.73 | 0.74 | 306.80 | 13.44 |
| **CT nasal** | 312.48 | 12.41 | 309.15 | 15.84 | 0.24 | 311.20 | 13.80 |
| **CT inferior** | 337.79 | 12.72 | 329.71 | 12.67 | 0.01* | 334.61 | 13.20 |
| **CT temporal** | 311.81 | 11.74 | 310.36 | 13.43 | 0.40 | 311.24 | 12.33 |
| **CT central** | 280.90 | 18.71 | 267.76 | 23.54 | 0.03* | 275.74 | 21.53 |
| **CT parafoveal** | 316.62 | 11.34 | 313.89 | 13.21 | 0.41 | 315.55 | 12.06 |
| **CVI superior** | 50.90 | 4.64 | 59.45 | 4.02 | <0.001 * | 54.14 | 6.06 |
| **CVI nasal** | 50.37 | 4.47 | 58.27 | 4.13 | <0.001 * | 53.28 | 5.77 |
| **CVI inferior** | 51.51 | 4.81 | 60.62 | 3.86 | <0.001 * | 54.87 | 6.28 |
| **CVI temporal** | 50.19 | 4.11 | 57.21 | 4.22 | <0.001 * | 52.78 | 5.34 |
| **CVI central** | 32.07 | 7.35 | 47.70 | 7.91 | <0.001 * | 38.00 | 10.71 |
| **CVI parafoveal** | 50.74 | 4.36 | 58.89 | 3.83 | <0.001 * | 53.74 | 5.73 |

**Notes:** * Statistically significant (p<0.05);

**Abbreviations:** DM, diabetes mellitus type 2; SD, standard deviation; CT, choroidal thickness; CVI, choroidal vascularity index.
